# Supplementary material for: An Organometallic Gold(I) Bis‐N‐Heterocyclic Carbene Complex with Multimodal Activity in Ovarian Cancer Cells
Source: PubMed Central journal article supplement — Chemistry. 2020 Nov 3;26(67):15528–37. doi: 10.1002/chem.202003495 (PMC7756355; doi:10.1002/chem.202003495), 2020-11-03
Supplement: CHEM-26-15528-s001.pdf [file CHEM-26-15528-s001.pdf]

# Chemistry–A European Journal

Supporting Information

## **An Organometallic Gold(I) Bis-N-Heterocyclic Carbene Complex with Multimodal Activity in Ovarian Cancer Cells**

Samuel M. Meier-Menches,<sup>\*[a]</sup> Benjamin Neuditschko,<sup>[a, b]</sup> Katja Zappe,<sup>[a]</sup> Martin Schaier,<sup>[a]</sup> Marlene C. Gerner,<sup>[c]</sup> Klaus G. Schmetterer,<sup>[c]</sup> Giorgia Del Favero,<sup>[d, e]</sup> Riccardo Bonsignore,<sup>[f]</sup> Margit Cichna-Markl,<sup>[a]</sup> Gunda Koellensperger,<sup>[a]</sup> Angela Casini,<sup>\*[f]</sup> and Christopher Gerner<sup>\*[a, e, g]</sup>

p.S2–S6      Supplementary Tables S1–S6  
p.S7–S12     Supplementary Figures S1–S6

## Supplementary Tables

**Table S1.** Groups of significantly regulated proteins associated with the nucleolus obtained from the proteomic response profiling experiments. The LFQ intensity values of a selection of regulated proteins are reported in cytoplasmic (CYT) and nuclear (NE) fraction. # = multi-parameter significant protein regulation (FDR = 0.05, S0 = 0.1).

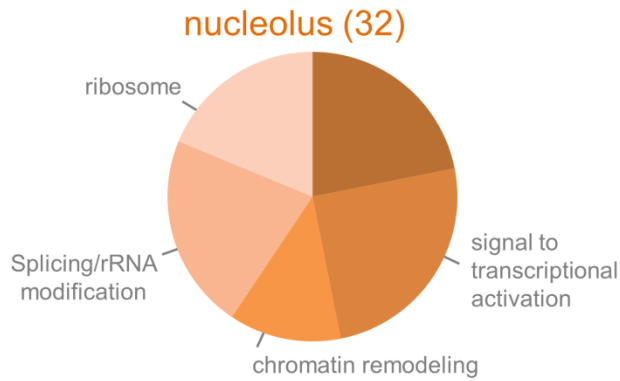

| Group                                       | Fraction | FC    | Gene    | Accession |
|---------------------------------------------|----------|-------|---------|-----------|
| Stress-signal to transcriptional activation | CYT      | 5,26  | HMOX1   | P09601    |
|                                             | CYT      | 5,07  | KDM2A   | Q9Y2K7    |
|                                             | CYT      | 1,91  | TXNRD1  | Q16881    |
|                                             | CYT      | 1,20  | STAT1   | P42224    |
|                                             | CYT      | -2,47 | SMARCA4 | P51532    |
|                                             | NE       | 6,67  | HMOX1   | P09601    |
|                                             | NE       | 1,49  | PML     | P29590    |
| chromatin remodeling                        | NE       | 2,80  | STAT1   | P42224    |
|                                             | CYT      | -1,25 | FEN1    | P39748    |
|                                             | NE       | -1,22 | TOP2A   | P11388    |
|                                             | NE       | 1,12  | XRCC5   | P13010    |
| splicing/rRNA processing                    | NE       | 1,32  | CDCA8   | Q53HL2    |
|                                             | CYT      | -1,26 | DDX5    | P17844    |
|                                             | NE       | 1,27  | DDX18   | Q9NVP1    |
|                                             | NE       | -1,24 | DDX6    | P26196    |
|                                             | NE       | 1,21  | DIMT1   | Q9UNQ2    |
|                                             | NE       | 1,66  | IMP4    | Q96G21    |
|                                             | NE       | 1,48  | NSUN2   | Q08J23    |
| ribosome                                    | NE       | 1,30  | RNMT    | O43148    |
|                                             | CYT      | 1,16  | EIF6    | P56537    |
|                                             | NE       | -1,21 | RPL13A  | P40429    |
|                                             | NE       | -1,19 | RPL4    | P36578    |
|                                             | NE       | -1,33 | RPS19   | P39019    |
| NE                                          | -1,22    | SBDS  | Q9Y3A5  |           |

### stress-signal to transcriptional activation

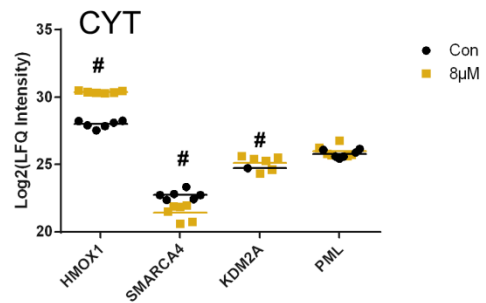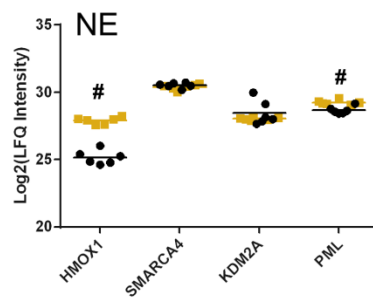

**Table S2.** Groups of significantly regulated proteins associated with telomeres obtained from the proteomic response profiling experiments. The LFQ intensity values of a selection of regulated proteins are reported in cytoplasmic (CYT) and nuclear (NE) fraction. # = multi-parameter significant protein regulation (FDR = 0.05, S0 = 0.1).

Telomere-associated proteins (14)

| Group                | Fraction | FC    | Gene  | Accession |
|----------------------|----------|-------|-------|-----------|
| telomere region      | CYT      | -1,25 | FEN1  | P39748    |
|                      | CYT      | -1,15 | MCM6  | Q14566    |
|                      | CYT      | -1,30 | MSH2  | P43246    |
|                      | CYT      | -1,26 | POLD1 | P28340    |
|                      | NE       | -1,44 | CBX1  | P83916    |
|                      | NE       | -1,42 | CBX3  | Q13185    |
|                      | NE       | 2,49  | HAT1  | O14929    |
|                      | NE       | 1,49  | PML   | P29590    |
|                      | NE       | 1,30  | RPA1  | P27694    |
|                      | NE       | 1,29  | RPA2  | P15927    |
| telomere maintenance | NE       | 1,40  | CCT6A | P40227    |
|                      | NE       | 1,51  | CCT8  | P50990    |
|                      | NE       | 1,48  | TCP1  | P17987    |
|                      |          |       |       |           |

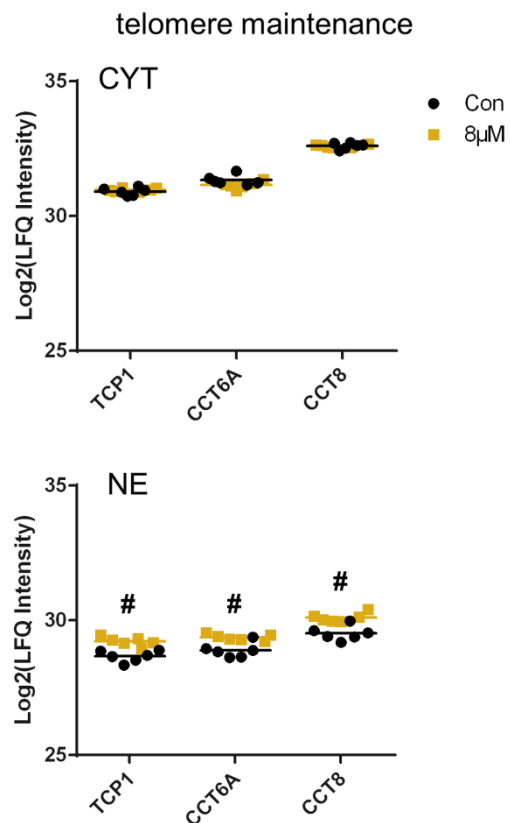

**Table S3.** Groups of significantly regulated proteins associated with actin stress fibers obtained from the proteomic response profiling experiments. The LFQ intensity values of a selection of regulated proteins are reported in cytoplasmic (CYT) and nuclear (NE) fraction. # = multi-parameter significant protein regulation (FDR = 0.05, S0 = 0.1).

**Actin stress fibers (18)**

| Group              | Fraction | FC    | Gene   | Accession |
|--------------------|----------|-------|--------|-----------|
| Actin stress fiber | CYT      | 1,31  | FLNB   | O75369    |
|                    | NE       | 3,44  | RRAS   | P10301    |
|                    | NE       | -2,07 | ACTN1  | P12814    |
|                    | NE       | -2,04 | ACTN4  | O43707    |
|                    | NE       | -2,02 | CFL2   | Q9Y281    |
|                    | NE       | -1,38 | CORO1C | Q9ULV4    |
|                    | NE       | -1,55 | FSCN1  | Q16658    |
|                    | NE       | -1,68 | FLNA   | P21333    |
|                    | NE       | -1,49 | LIMA1  | Q9UHB6    |
|                    | NE       | -1,88 | PDLIM5 | Q96HC4    |
|                    | NE       | -1,77 | PDLIM7 | Q9NR12    |
|                    | NE       | -1,70 | ENAH   | Q8N8S7    |
|                    | NE       | -1,60 | RDX    | P35241    |
|                    | NE       | -1,45 | Sep 02 | Q15019    |
|                    | NE       | -1,51 | Sep 06 | Q14141    |
|                    | NE       | -1,47 | Sep 07 | Q16181    |
|                    | NE       | -1,56 | Sep 09 | Q9UHD8    |
|                    | NE       | -1,56 | Sep 11 | Q9NVA2    |

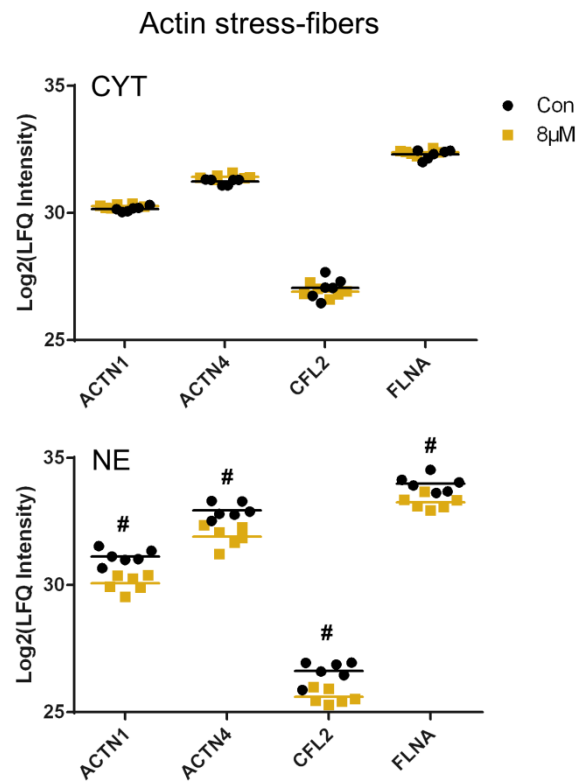

**Table S4.** Groups of significantly regulated proteins associated with stress-response obtained from the proteomic response profiling experiments. The LFQ intensity values of a selection of regulated proteins are reported in cytoplasmic (CYT) and nuclear (NE) fraction. # = multi-parameter significant protein regulation (FDR = 0.05, S0 = 0.1).

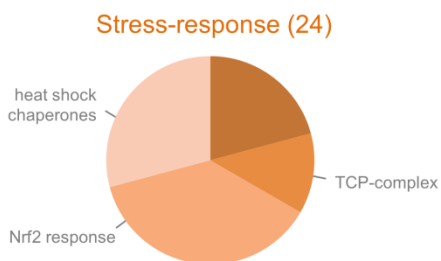

| Group                 | Fraction | FC    | Gene    | Accession |
|-----------------------|----------|-------|---------|-----------|
| TCP-complex           | NE       | 1.40  | CCT6A   | P40227    |
|                       | NE       | 1.51  | CCT8    | P50990    |
|                       | NE       | 1.48  | TCP1    | P17987    |
| Nrf2 response         | CYT      | 1.52  | GCLC    | P48506    |
|                       | CYT      | 2.09  | GCLM    | P48507    |
|                       | CYT      | 1.30  | GSR     | P00390    |
|                       | CYT      | 5.26  | HMOX1   | P09601    |
|                       | CYT      | -1.29 | PRDX2   | P32119    |
|                       | CYT      | -2.59 | TXNL1   | O43396    |
|                       | CYT      | 1.91  | TXNRD1  | Q16881    |
|                       | NE       | 4.35  | GSTM5   | P46439    |
|                       | NE       | 6.67  | HMOX1   | P09601    |
| heat shock chaperones | CYT      | 2.10  | HSPA1B  | P0DMV9    |
|                       | CYT      | 1.59  | HSPB1   | P04792    |
|                       | NE       | 1.35  | DNAJB1  | P25685    |
|                       | NE       | -2.53 | DNAJB11 | Q9UBS4    |
|                       | NE       | 3.14  | DNAJC7  | Q99615    |
|                       | NE       | -1.23 | HSPA5   | P11021    |
|                       | NE       | 4.51  | HSPA6   | P17066    |

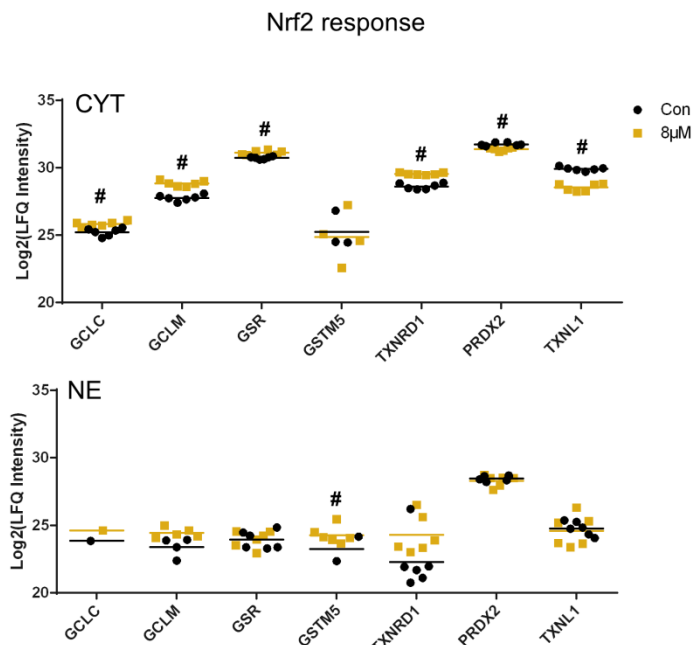

**Table S5.** Groups of significantly regulated proteins associated with the proteasome obtained from the proteomic response profiling experiments. The LFQ intensity values of a selection of regulated proteins are reported in cytoplasmic (CYT) and nuclear (NE) fraction. # = multi-parameter significant protein regulation (FDR = 0.05, S0 = 0.1).

### Proteasome (19)

| Group      | Fraction | FC    | Gene   | Accession |
|------------|----------|-------|--------|-----------|
| proteasome | CYT      | 2,36  | PSMB4  | P28070    |
|            | CYT      | -2,59 | TXNL1  | O43396    |
|            | NE       | 2,22  | ADRM1  | Q16186    |
|            | NE       | 1,80  | PSMA3  | P25788    |
|            | NE       | 3,03  | PSMC1  | P62191    |
|            | NE       | 4,97  | PSMC2  | P35998    |
|            | NE       | 2,09  | PSMC3  | P17980    |
|            | NE       | 3,08  | PSMC4  | P43686    |
|            | NE       | 2,56  | PSMC5  | P62195    |
|            | NE       | 4,58  | PSMC6  | P62333    |
|            | NE       | 4,42  | PSMD1  | Q99460    |
|            | NE       | 2,20  | PSMD2  | Q13200    |
|            | NE       | 2,69  | PSMD3  | O43242    |
|            | NE       | 2,12  | PSMD4  | P55036    |
|            | NE       | 2,86  | PSMD8  | P48556    |
|            | NE       | 2,50  | PSMD11 | O00231    |
|            | NE       | 2,73  | PSMD13 | Q9UNM6    |
|            | NE       | 2,71  | PSMD14 | O00487    |

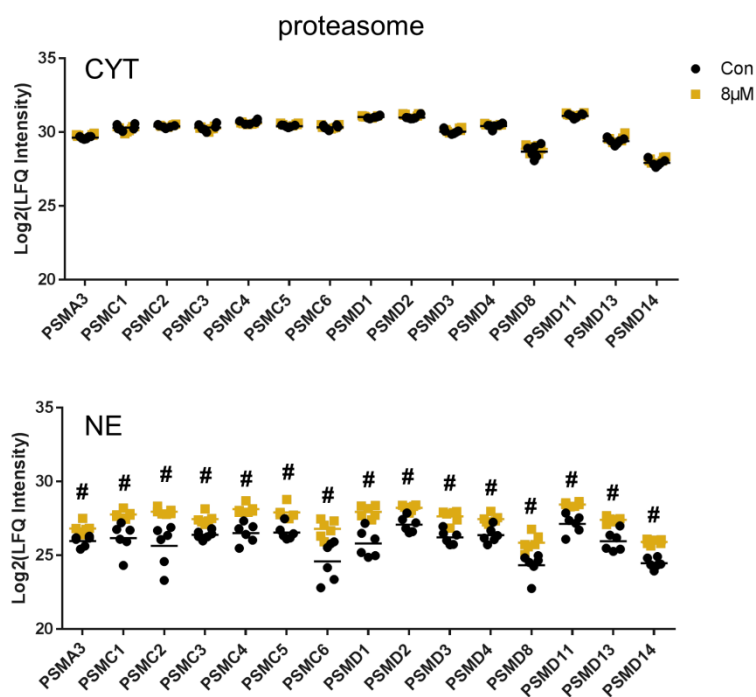

## Supplementary Figures

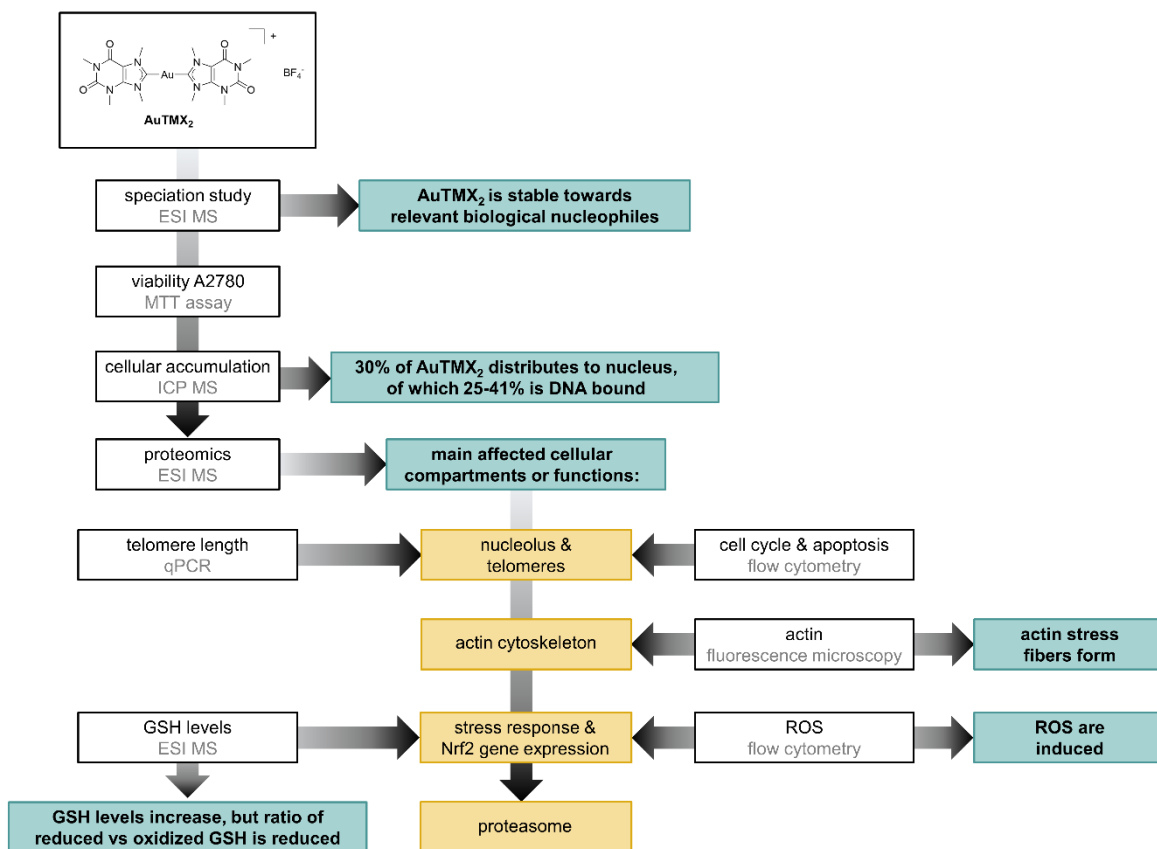

**Figure S1.** The figure summarizes the experimental workflow of this study and highlights the main results.



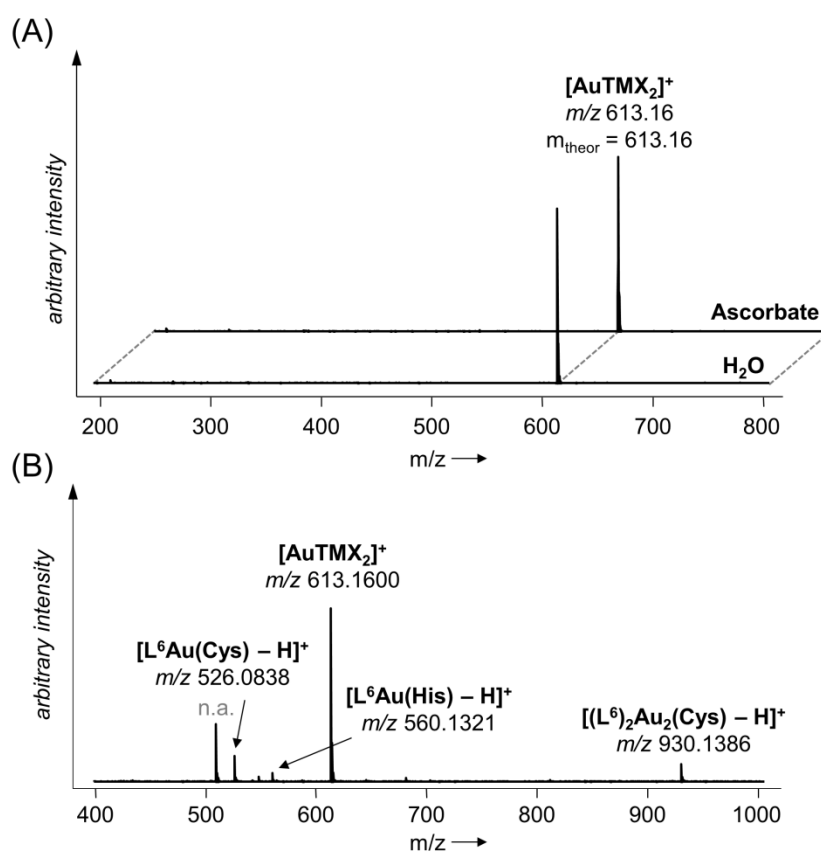

**Figure S2.** (A) ESI-ion trap mass spectrum of  $\text{AuTMX}_2$  dissolved in aqueous solution or in the presence of ascorbate for 24 h.  $\text{AuTMX}_2$  remains stable over the entire incubation period. (B) ESI-TOF mass spectrum of  $\text{AuTMX}_2$  in the presence of His, Cys, Met, Glu and  $^{\text{Me}}\text{Se-Cys}$  after 24 h. Adduct formation occurs exclusively with Cys and His after release of one TMX ligand.

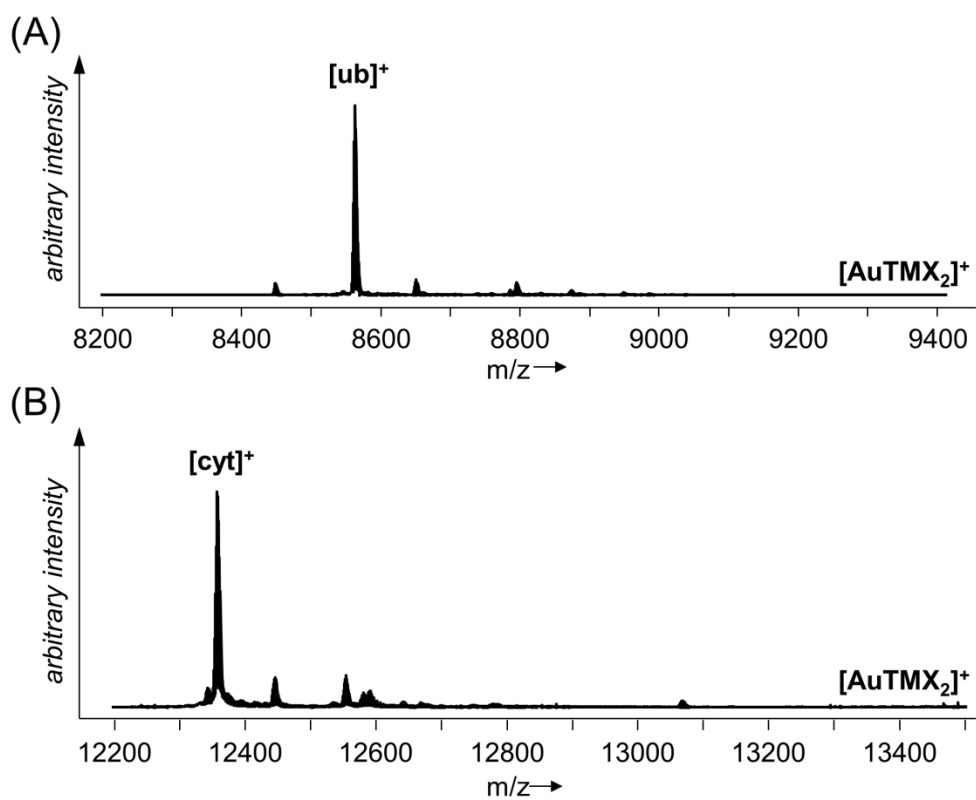

**Figure S3.** (A) Deconvoluted ESI-TOF mass spectra of ubiquitin (A) and cytochrome C (B) exposed to AuTMX<sub>2</sub> for 24 h. No adducts were observed.

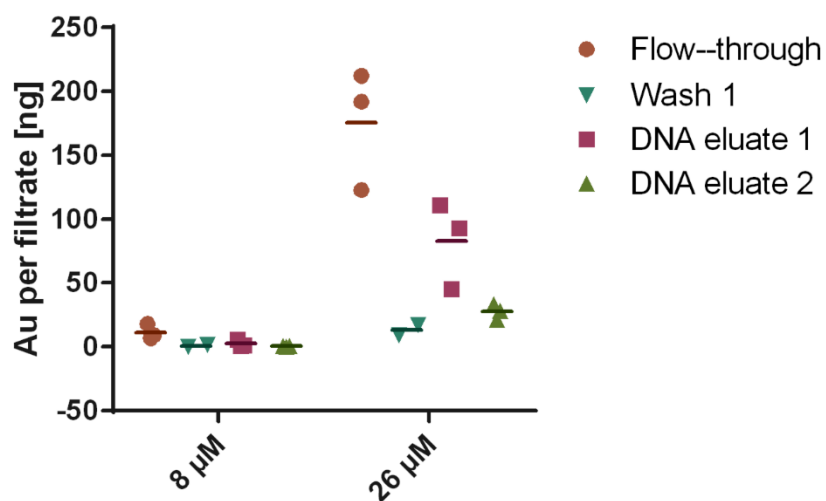

**Figure S4.** Amount of Au found during the DNA isolation process of A2780 (cancer) cells in filtrates after loading the lysate to the spin column (flow-through), after the first washing step (wash 1) and in both eluates. In samples treated for 24 h with 8  $\mu\text{M}$  ( $2/3 \text{ EC}_{50}$ ) **AuTMX<sub>2</sub>**, DNA concentration of the eluate 1 and 2 were  $105.6 \pm 18.9 \text{ ng } \mu\text{L}^{-1}$  and  $55.0 \pm 8.6 \text{ ng } \mu\text{L}^{-1}$ , respectively. After 26  $\mu\text{M}$  ( $2 \times \text{EC}_{50}$ ) treatment, DNA concentration of the eluate 1 and 2 were  $110.7 \pm 17.9 \text{ ng } \mu\text{L}^{-1}$  and  $51.4 \pm 12.6 \text{ ng } \mu\text{L}^{-1}$ , respectively.

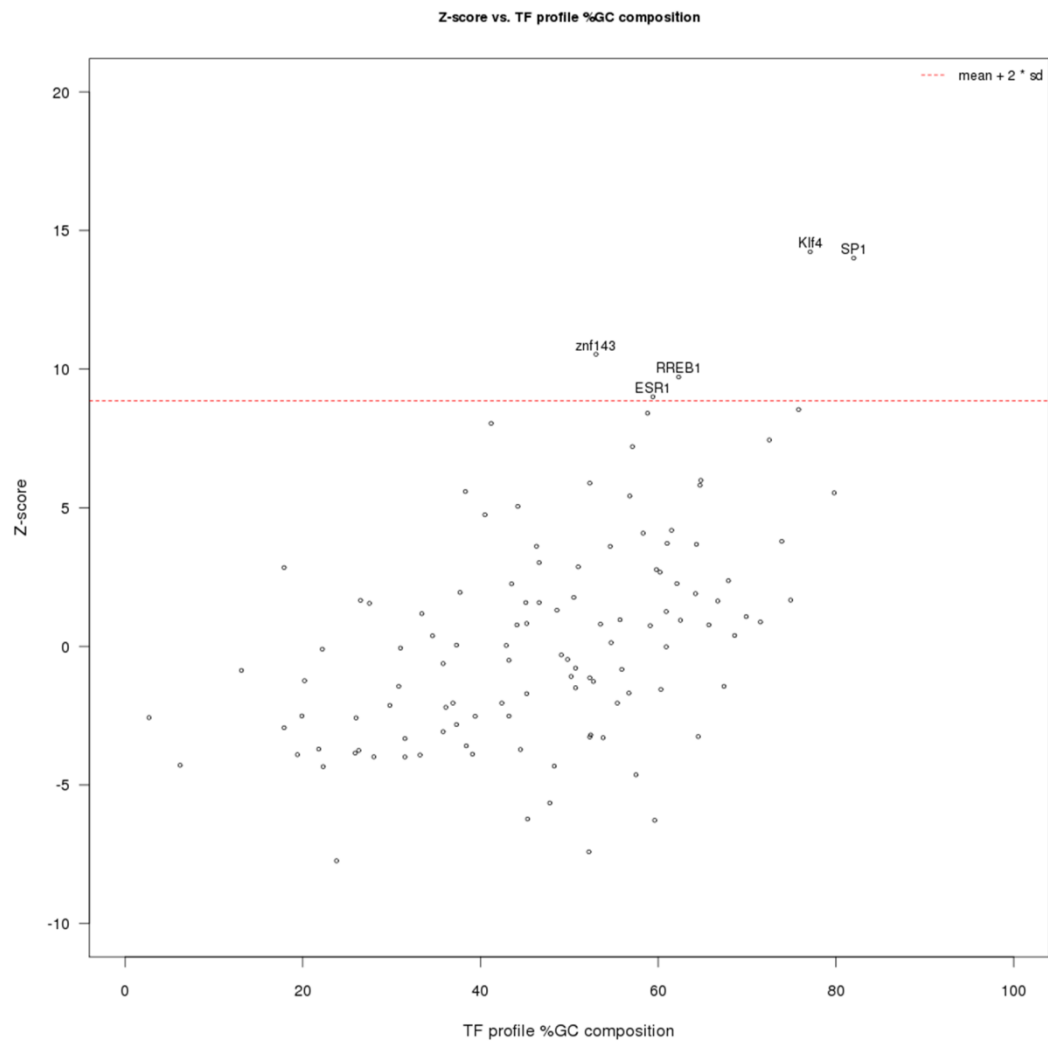

**Figure S5.** oPOSSUM search of enriched transcription factor activity from the set of significantly up-regulated proteins of **AuTMX<sub>2</sub>**-treated A2780 cancer cells.

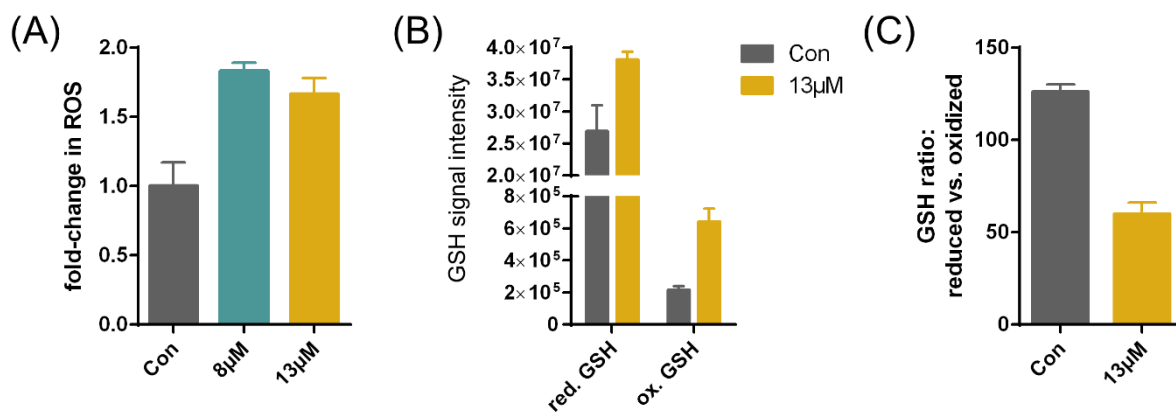

**Figure S6.** (A) Induction of reactive oxygen species (ROS) in A2780 cancer cells as measured by an increase in mean fluorescence intensity of the 2',7'-dichlorofluorescein (DCF) fluorophore upon treatment with **AuTMX<sub>2</sub>** for 24 h. Data were set relative to control cells. p-value (one-way ANOVA) = 0.0004. (B) Signal intensity of GSH stemming from reduced and oxidized glutathione (GSH) after treating A2780 cancer cells with **AuTMX<sub>2</sub>** at the indicated concentration for 24 h. (C) The ratio of reduced vs oxidized GSH of the signals in (B) as measured in untreated A2780 cancer cells and treated cells with **AuTMX<sub>2</sub>** (13 µM) for 24 h. p-value (unpaired, two-tailed) = 0.0001.
